# Supplementary material for: Association of residual cholesterol-inflammation index with MAFLD and related mortality risk: a population-based study integrating mediation and machine learning analyses
Source: Research Square preprint supplement (doi:10.21203/rs.3.rs-7620270/v1), 2025-10-03
Supplement: Supplementary file 1 [file 3ffe2f006a241232b451edf0.docx]

**Supplementary Materials**

Figure S1. Subgroup analysis of the association between RCII and risk of MAFLD.

Figure S2. Subgroup analysis of the association between RCII and all-cause mortality risk in patients with MAFLD.

Figure S3. Subgroup analysis of the association between RCII and cardiovascular mortality risk in patients with MAFLD.

Figure S4. Subgroup analysis of the association between RCII and premature mortality risk in patients with MAFLD.

Figure S5. Mendelian randomization analysis of the causal association between total cholesterol and MAFLD.

Figure S6. Mendelian randomization analysis of the causal association between LDL-C and MAFLD

Figure S7. Mendelian randomization analysis of the causal association between HDL-C and MAFLD

Figure S8. Mendelian randomization analysis of the causal association between CRP and MAFLD.

Figure S9. Key variables associated with MAFLD identified by the Boruta algorithm

Table S1. Estimated mediation effects of FPG on the associations between RCII and MAFLD or related mortality outcomes


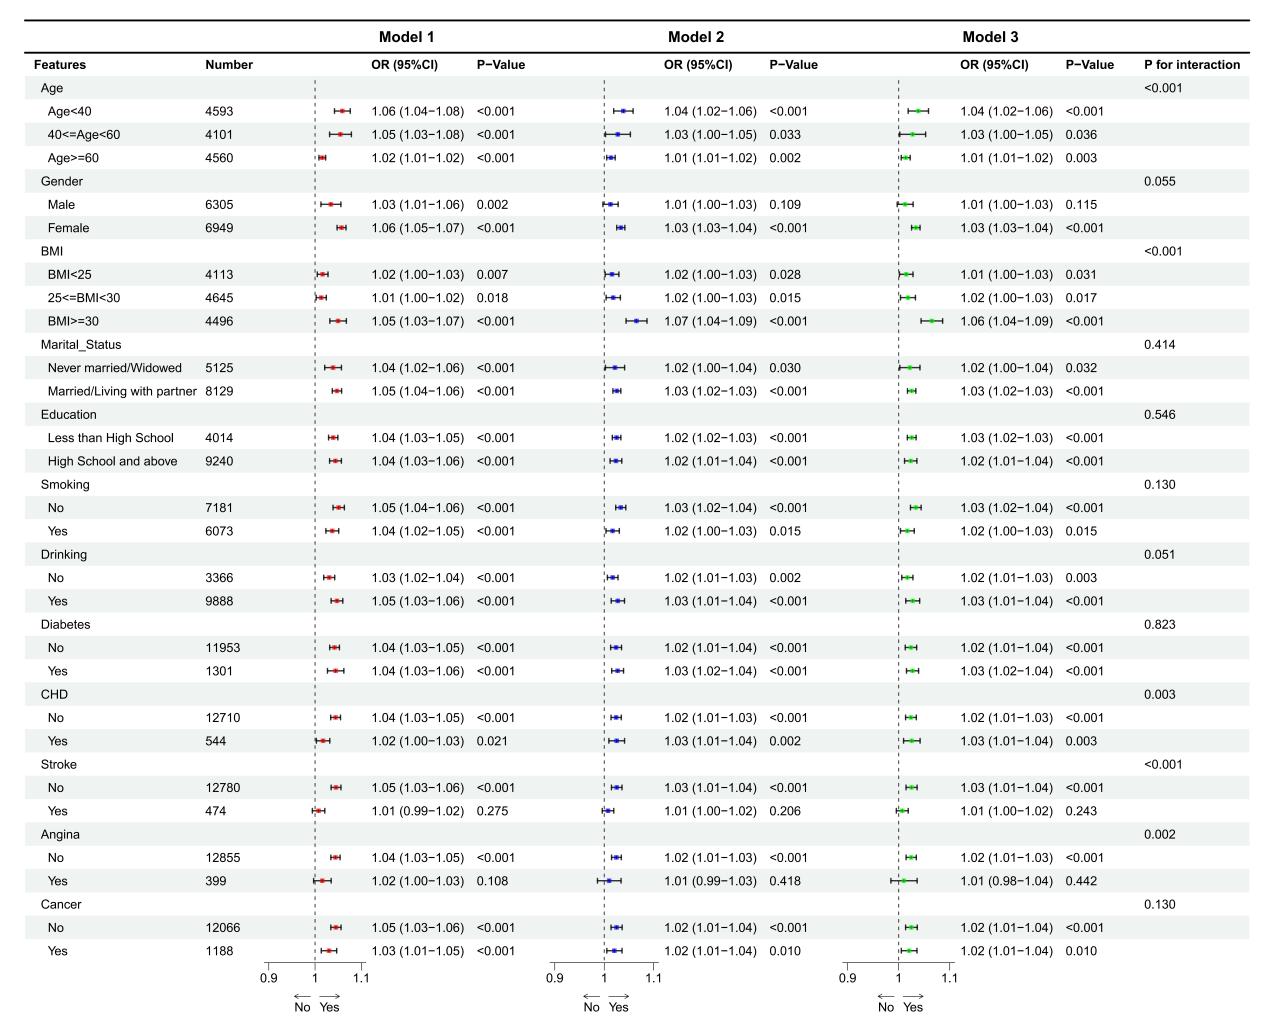


Figure S1. Subgroup analysis of the association between RCII and risk of MAFLD. RCII, Residual cholesterol-inflammation index; MAFLD, Metabolic dysfunction-associated fatty liver disease


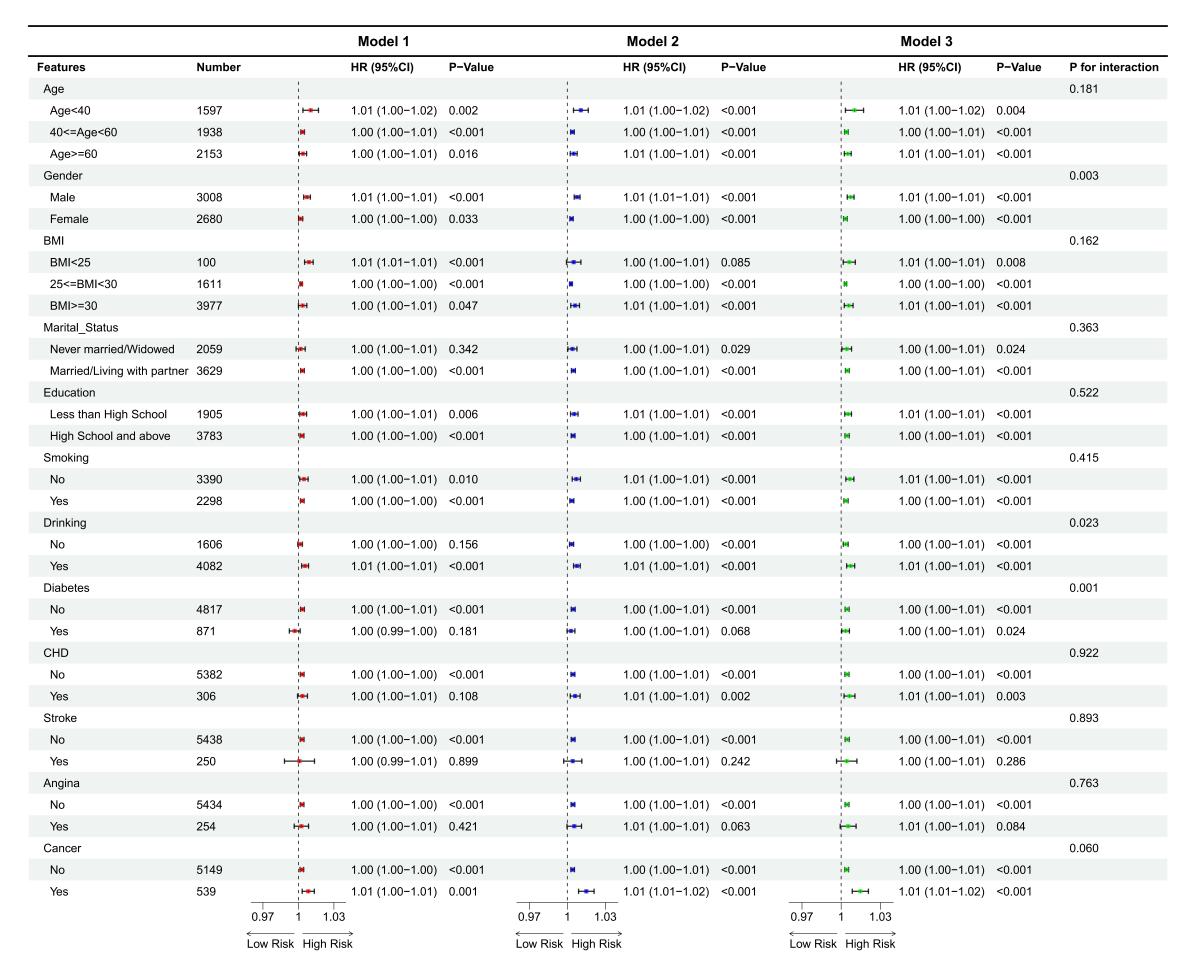


Figure S2. Subgroup analysis of the association between RCII and all-cause mortality risk in patients with MAFLD. RCII, Residual cholesterol-inflammation index; MAFLD, Metabolic dysfunction-associated fatty liver disease


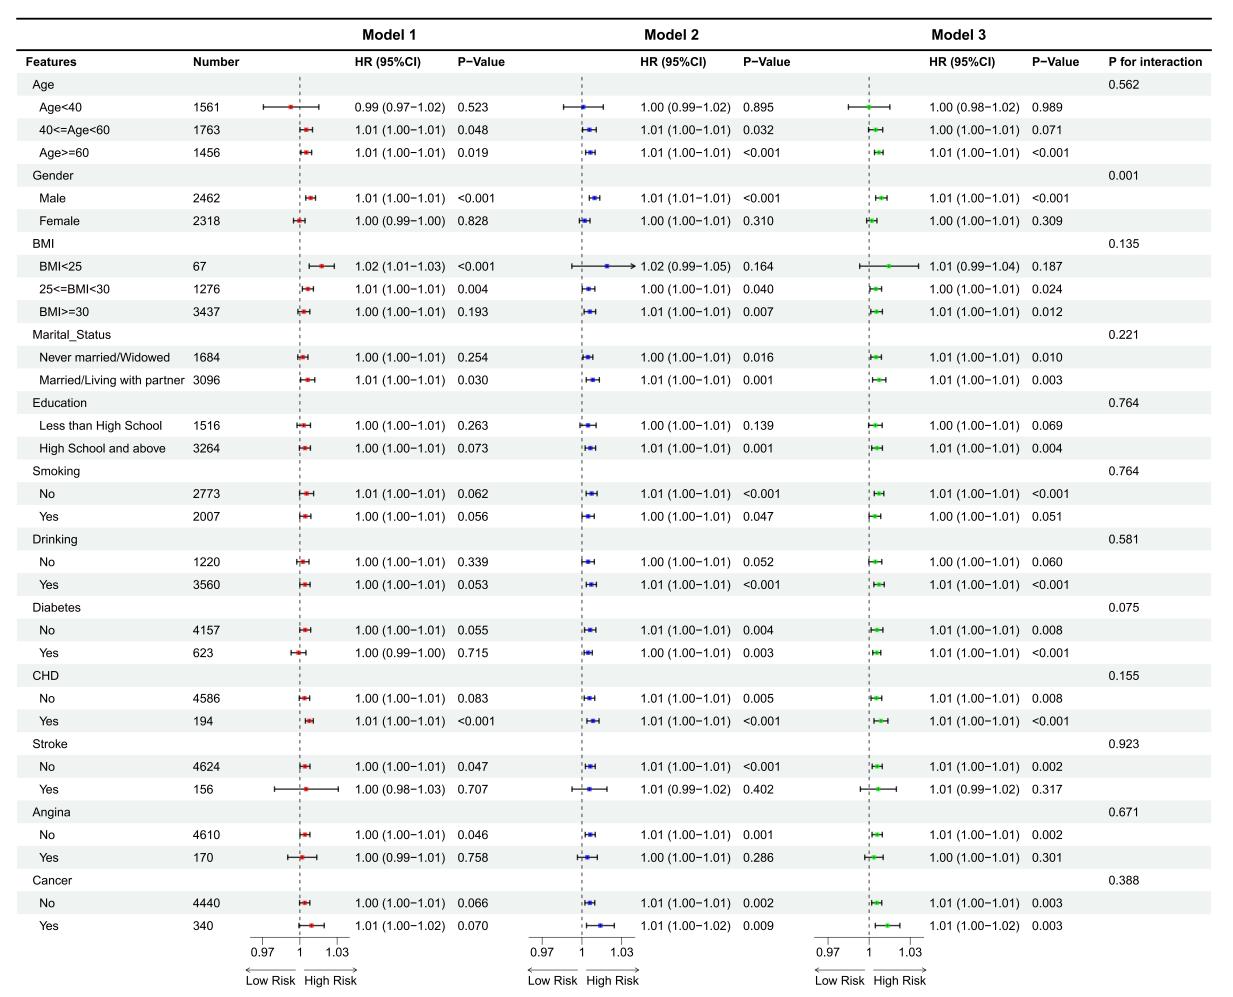


Figure S3. Subgroup analysis of the association between RCII and cardiovascular mortality risk in patients with MAFLD. RCII, Residual cholesterol-inflammation index; MAFLD, Metabolic dysfunction-associated fatty liver disease

**
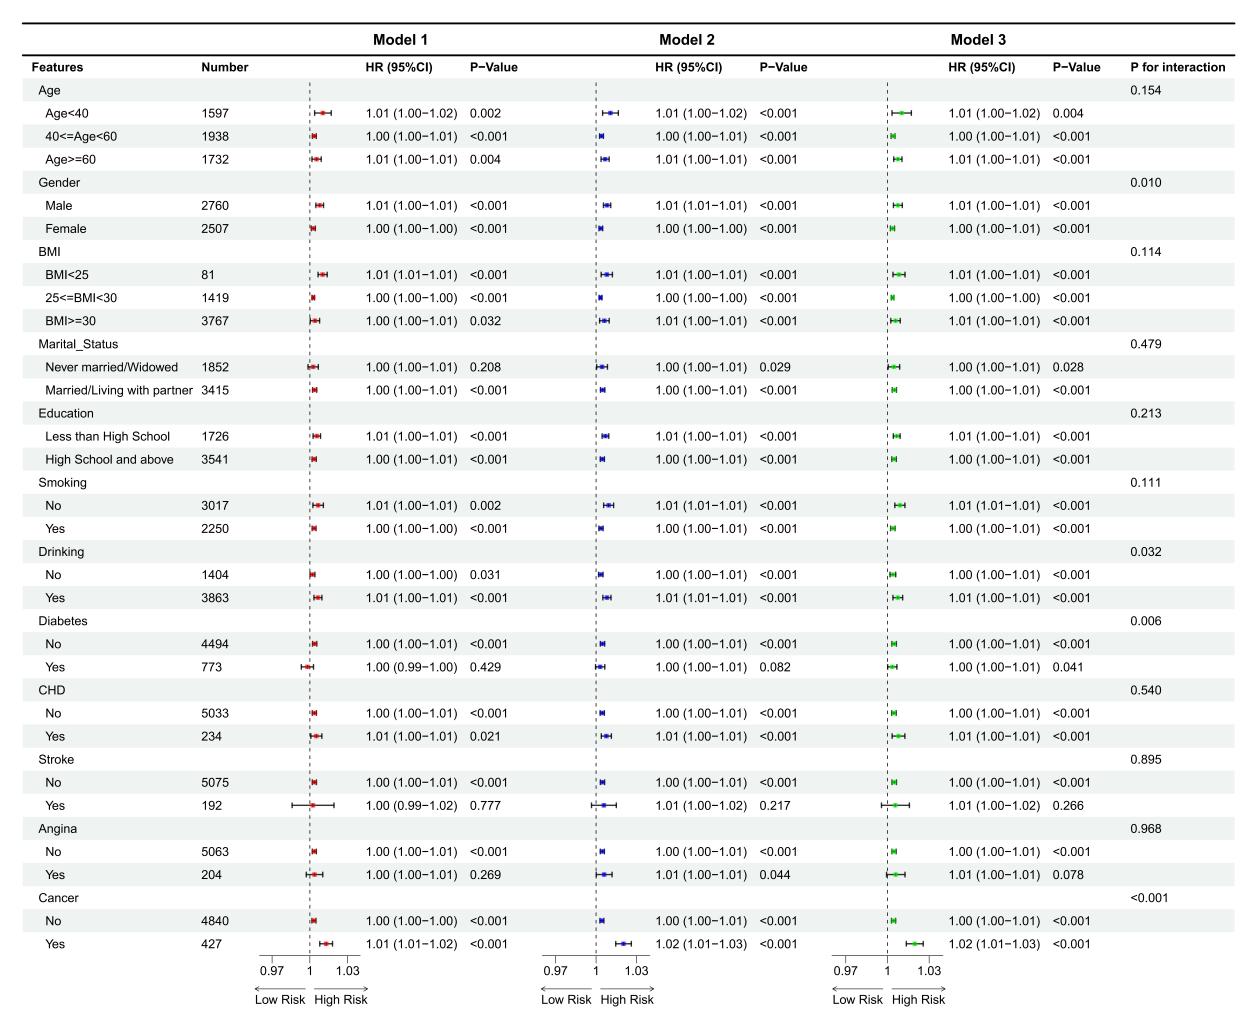
**

Figure S4. Subgroup analysis of the association between RCII and premature mortality risk in patients with MAFLD. RCII, Residual cholesterol-inflammation index; MAFLD, Metabolic dysfunction-associated fatty liver disease


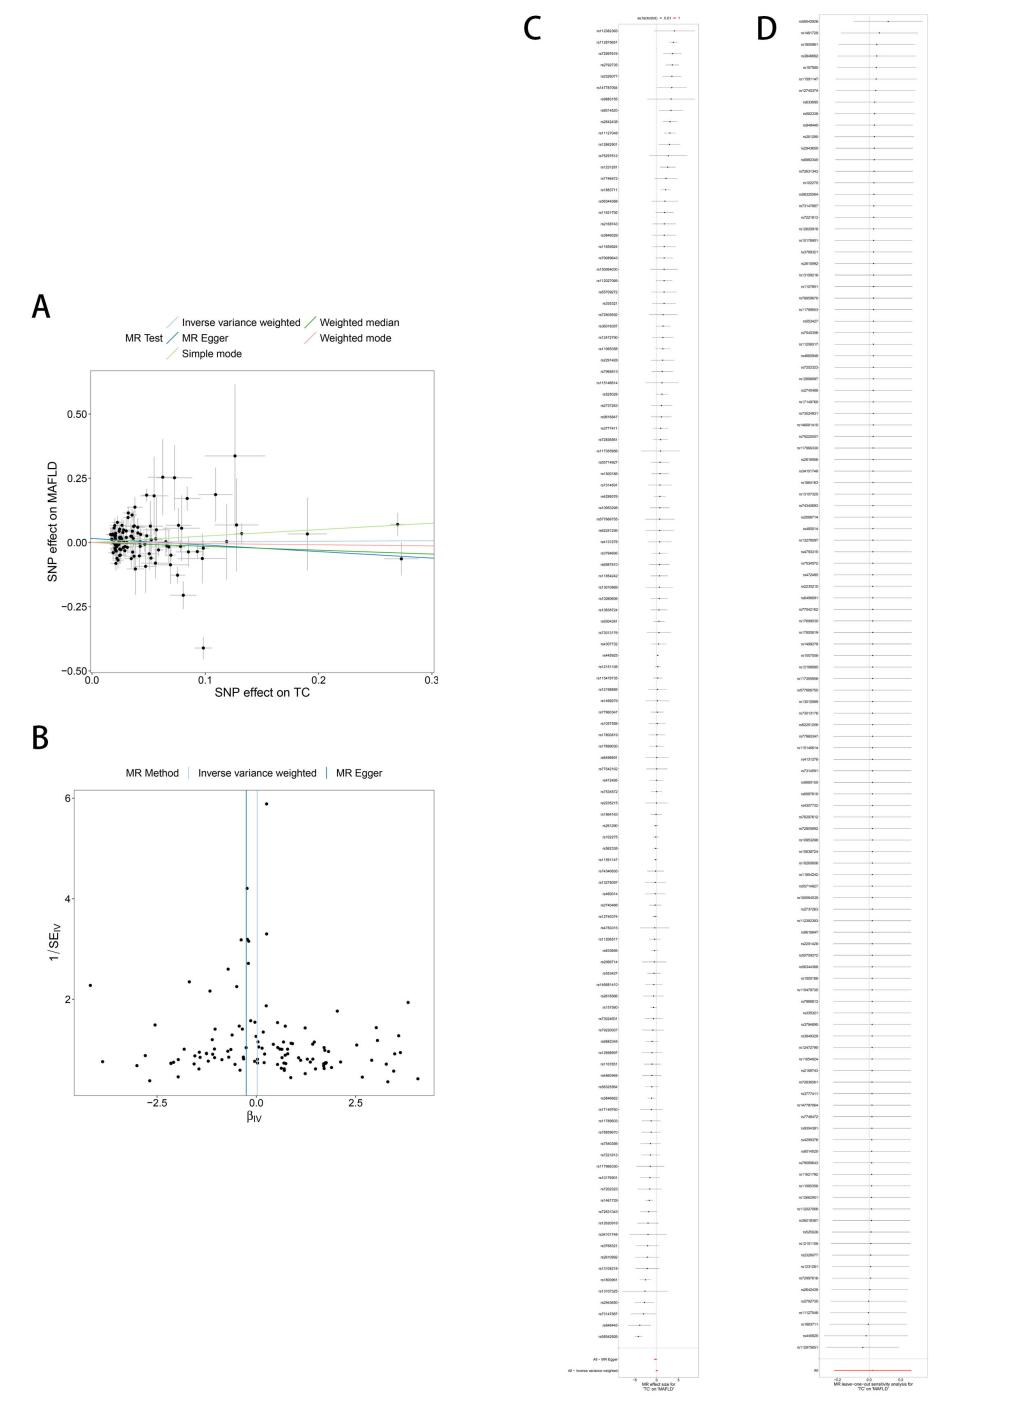


Figure S5. Mendelian randomization analysis of the causal association between total cholesterol and MAFLD. (A) Scatter plot of SNP effects on **total cholesterol** and MAFLD using multiple MR methods; (B) Funnel plot showing the distribution of instrumental variables; (C) Forest plot of single-SNP MR estimates; (D) Leave-one-out sensitivity analysis. MAFLD, Metabolic dysfunction-associated fatty liver disease; MR, Mendelian randomization; SNP, Single nucleotide polymorphisms.


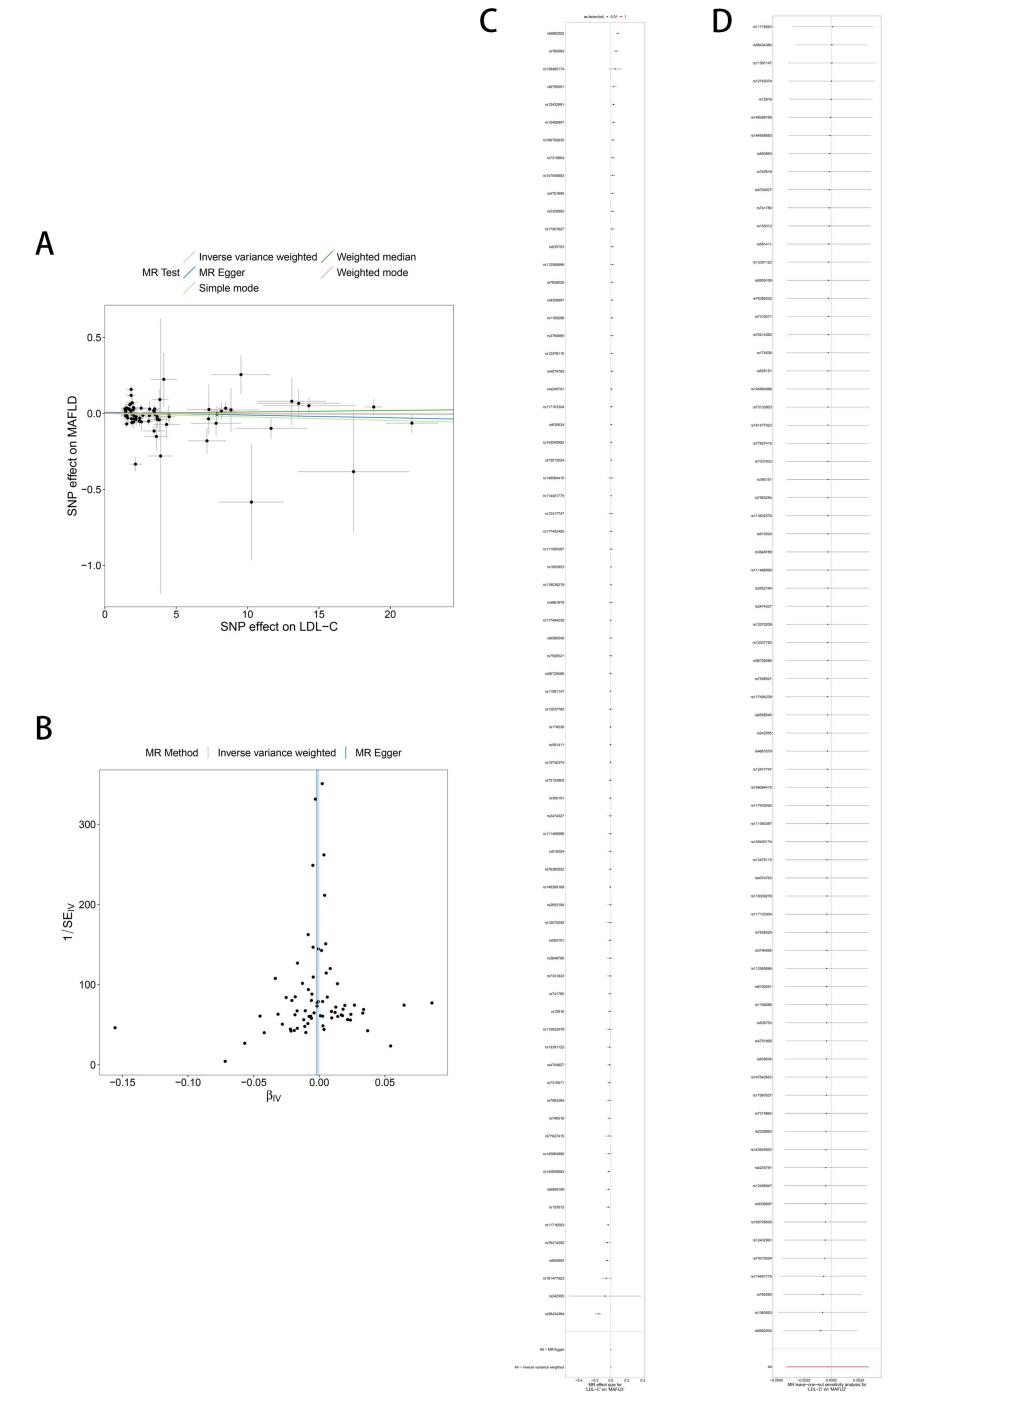


Figure S6. Mendelian randomization analysis of the causal association between LDL-C and MAFLD. (A) Scatter plot of SNP effects on LDL-C and MAFLD using multiple MR methods; (B) Funnel plot showing the distribution of instrumental variables; (C) Forest plot of single-SNP MR estimates; (D) Leave-one-out sensitivity analysis. MAFLD, Metabolic dysfunction-associated fatty liver disease; LDL-C, Low-density lipoprotein cholesterol; MR, Mendelian randomization; SNP, Single nucleotide polymorphisms.


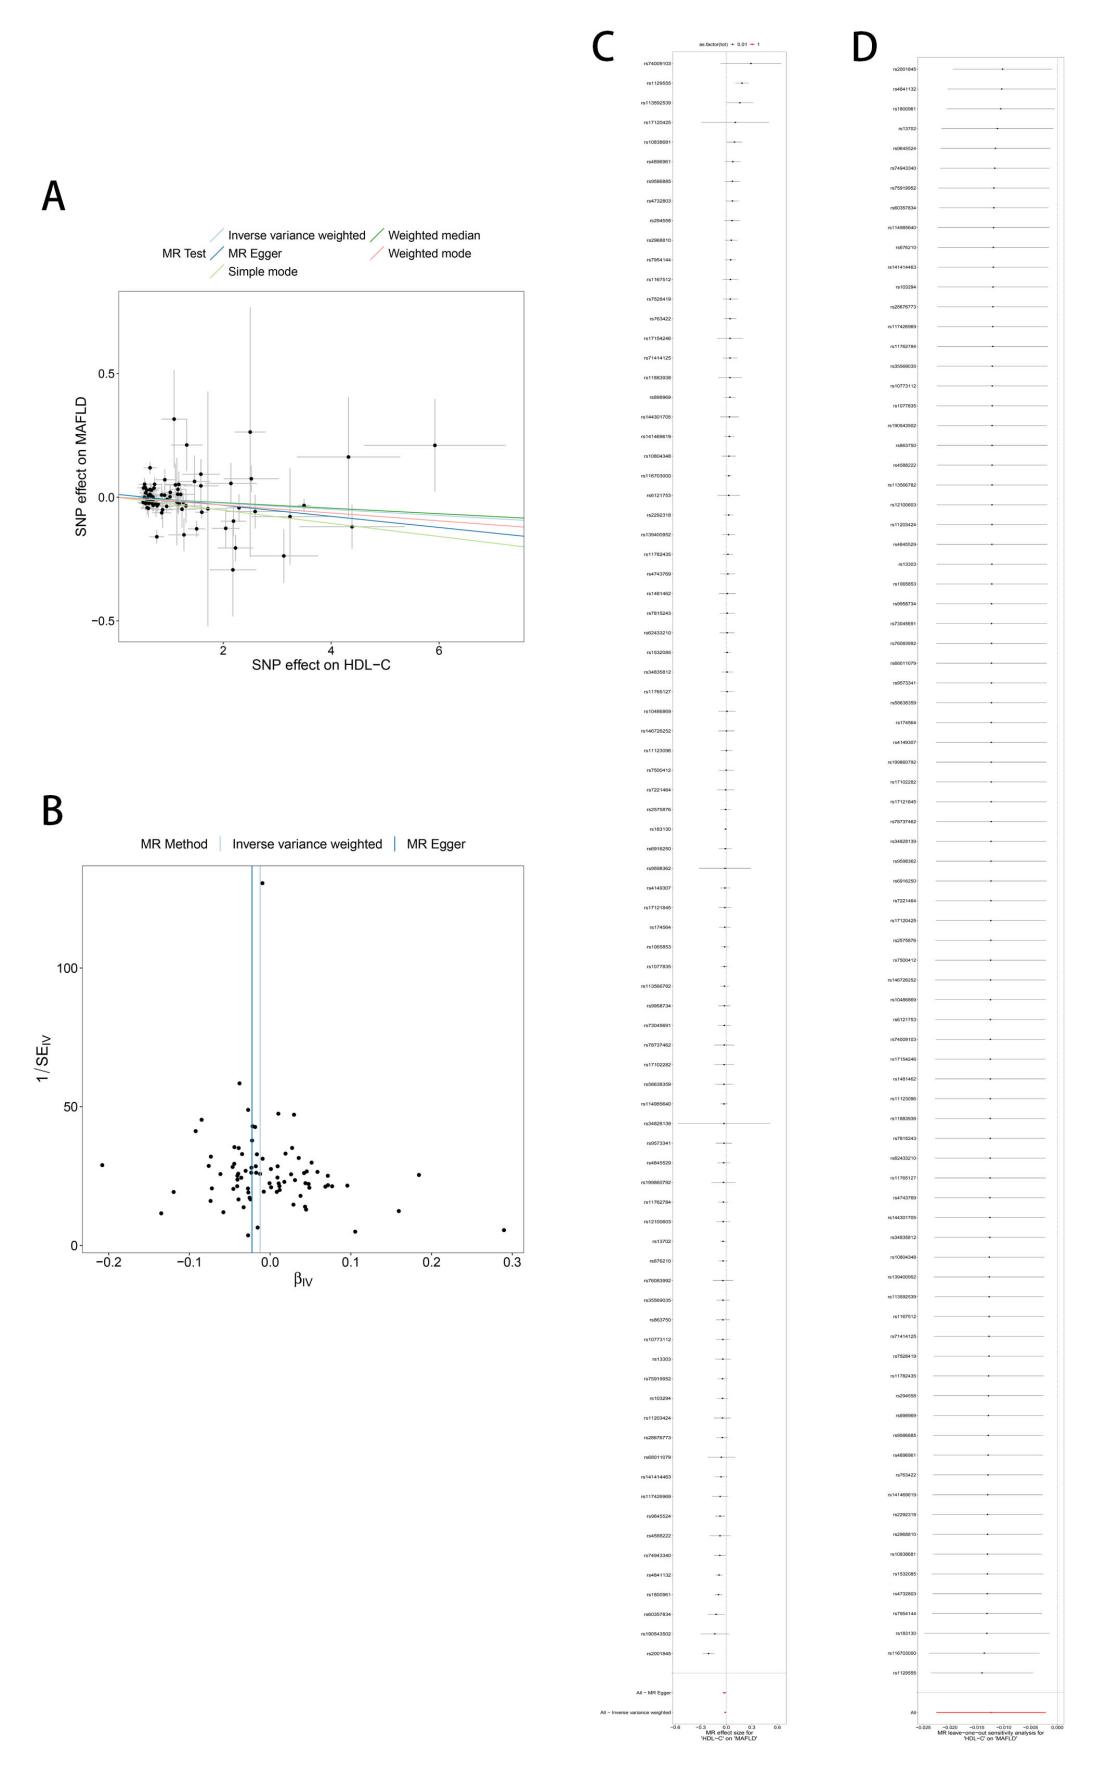


Figure S7. Mendelian randomization analysis of the causal association between HDL-C and MAFLD. (A) Scatter plot of SNP effects on HDL-C and MAFLD using multiple MR methods; (B) Funnel plot showing the distribution of instrumental variables; (C) Forest plot of single-SNP MR estimates; (D) Leave-one-out sensitivity analysis. MAFLD, Metabolic dysfunction-associated fatty liver disease; HDL-C, Hight-density lipoprotein cholesterol; MR, Mendelian randomization; SNP, Single nucleotide polymorphisms.


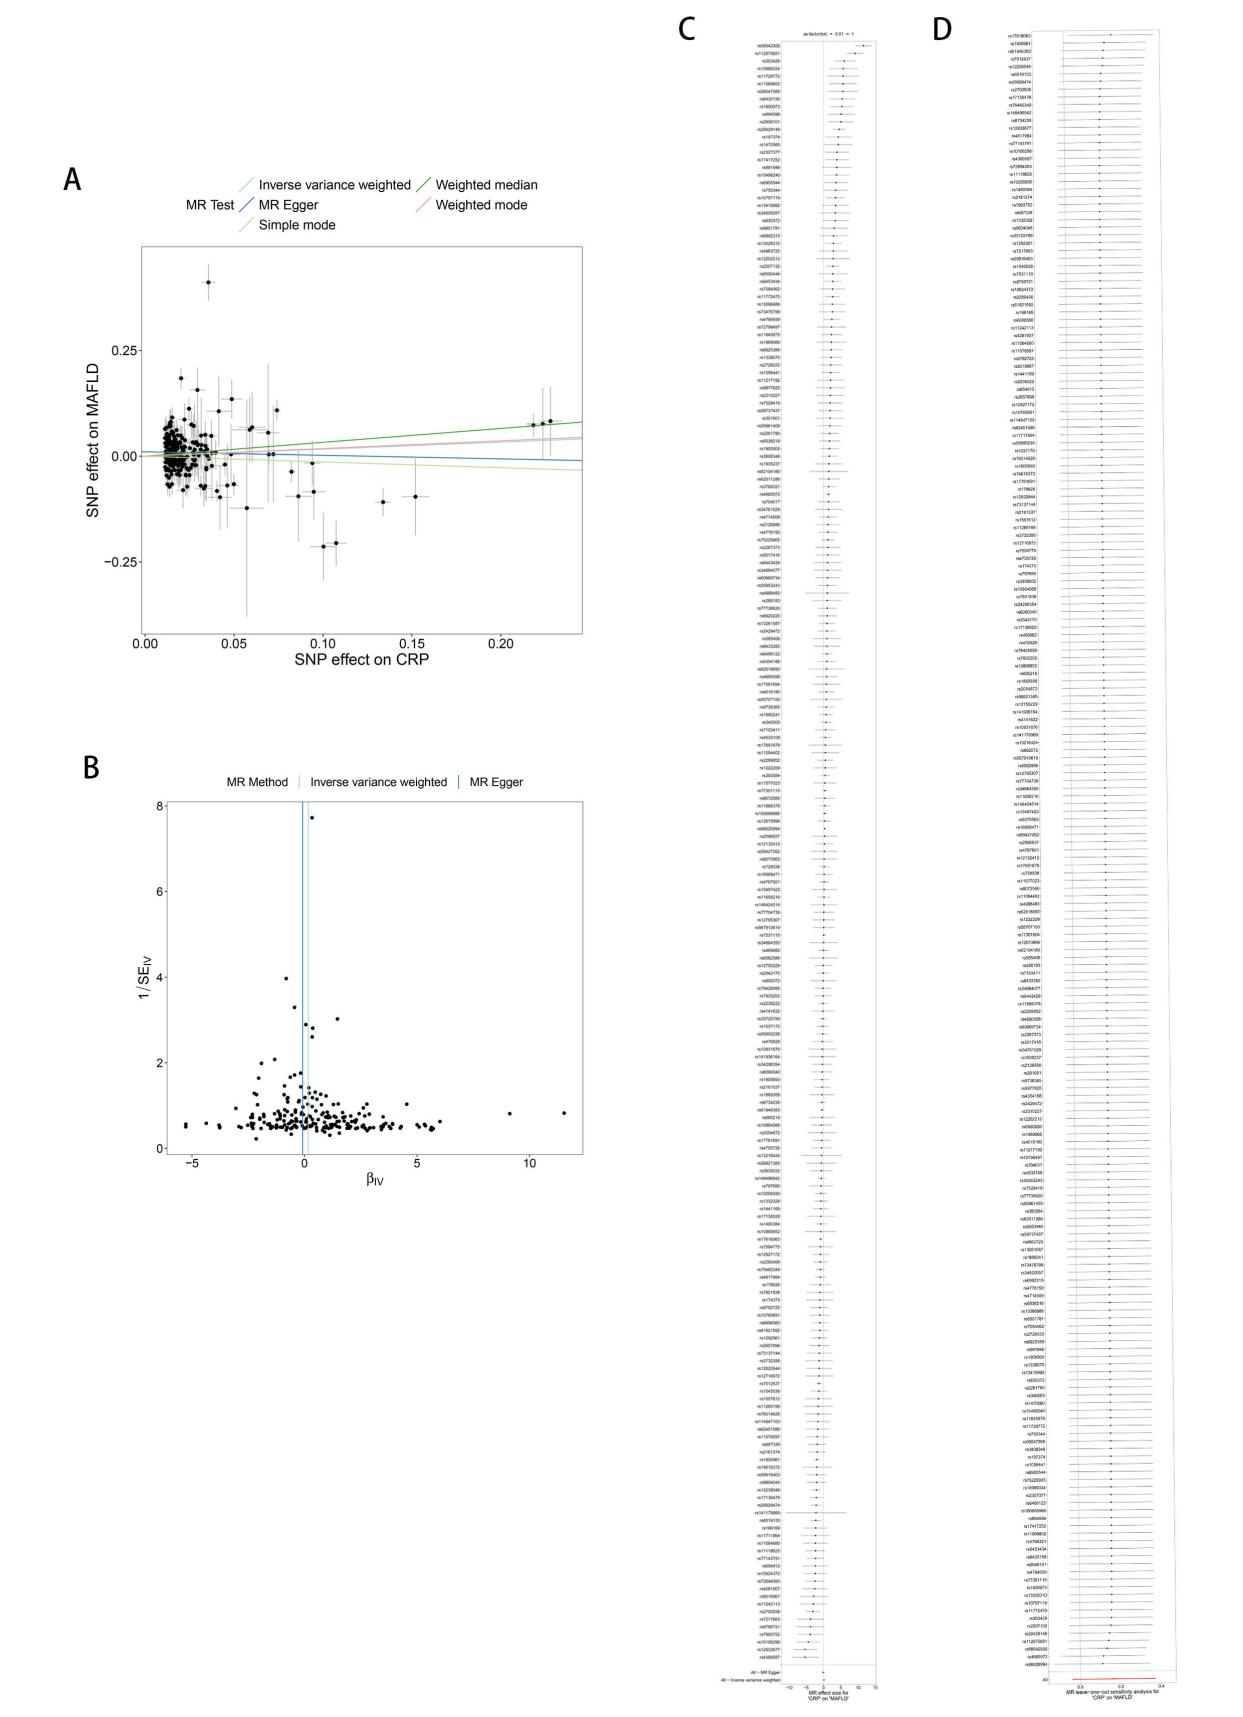


Figure S8. Mendelian randomization analysis of the causal association between CRP and MAFLD. (A) Scatter plot of SNP effects on CRP and MAFLD using multiple MR methods; (B) Funnel plot showing the distribution of instrumental variables; (C) Forest plot of single-SNP MR estimates; (D) Leave-one-out sensitivity analysis. CRP, C-reaction protein; MAFLD, Metabolic dysfunction-associated fatty liver disease; SNP, Single nucleotide polymorphisms; MR, Mendelian randomization.


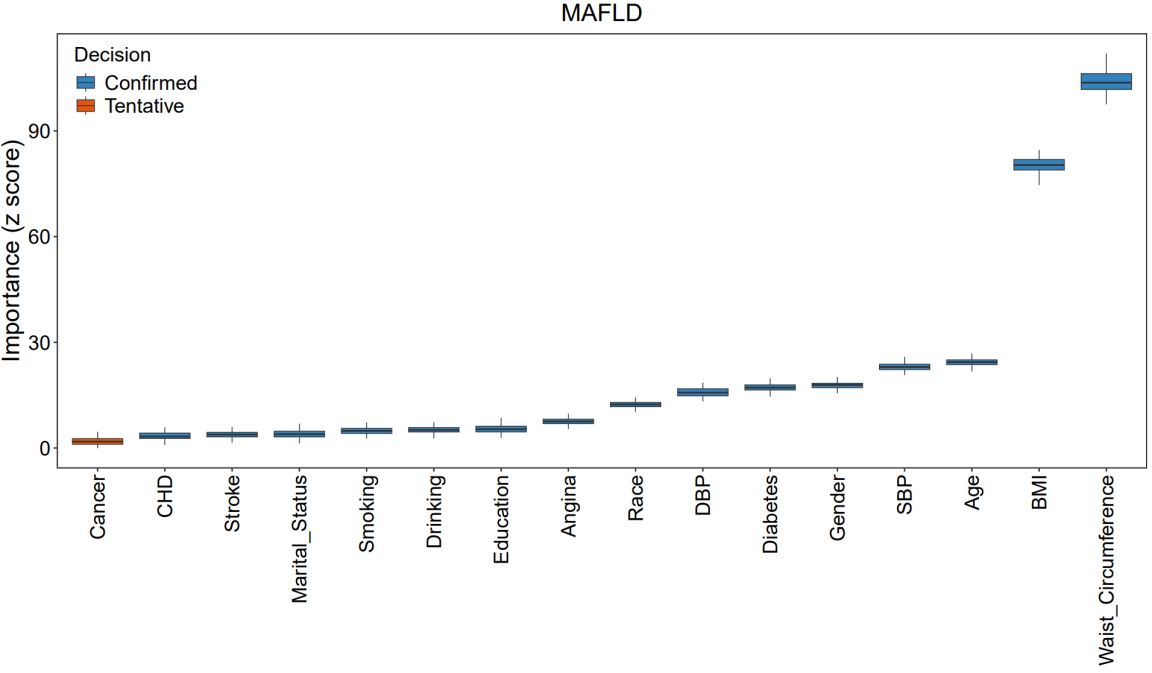


Figure S9. Key variables associated with MAFLD identified by the Boruta algorithm. MAFLD, Metabolic dysfunction-associated fatty liver disease

Table S1. Estimated mediation effects of FPG on the associations between RCII and MAFLD or related mortality outcomes

| Exposure | Mediator | Outcome | ADE | ADE P-Value | ACME | ACME P-Value | Total Effect | Total Effect P-Value | Proportion Mediated (%) | Proportion P-Value |
| --- | --- | --- | --- | --- | --- | --- | --- | --- | --- | --- |
| RCII | FPG | MAFLD | 0 | <0.001 | 0 | <0.001 | 0.001 | <0.001 | 2.02 | <0.001 |
| RCII | FPG | All-cause mortality | -2.83 | <0.001 | -0.21 | <0.001 | -3.03 | <0.001 | 6.76 | <0.001 |
| RCII | FPG | CVD mortality | -14.81 | <0.001 | -1.32 | <0.001 | -16.13 | <0.001 | 8.06 | <0.001 |
| RCII | FPG | Premature death | -2.31 | <0.001 | -0.18 | <0.001 | -2.5 | <0.001 | 7.33 | <0.001 |

FPG, Fasting plasma glucose; RCII, Residual cholesterol-inflammation index; MAFLD, Metabolic dysfunction-associated fatty liver disease; CVD, Cardiovascular disease; ADE, Average direct effect; ACME, Average causal mediation effect
